# Supplementary material
Source: publisher site journal article supplement (https://www.dovepress.com/get_supplementary_file.php?f=252958.docx)
Supplement: Supplementary file 1 [file get_supplementary_file.php]

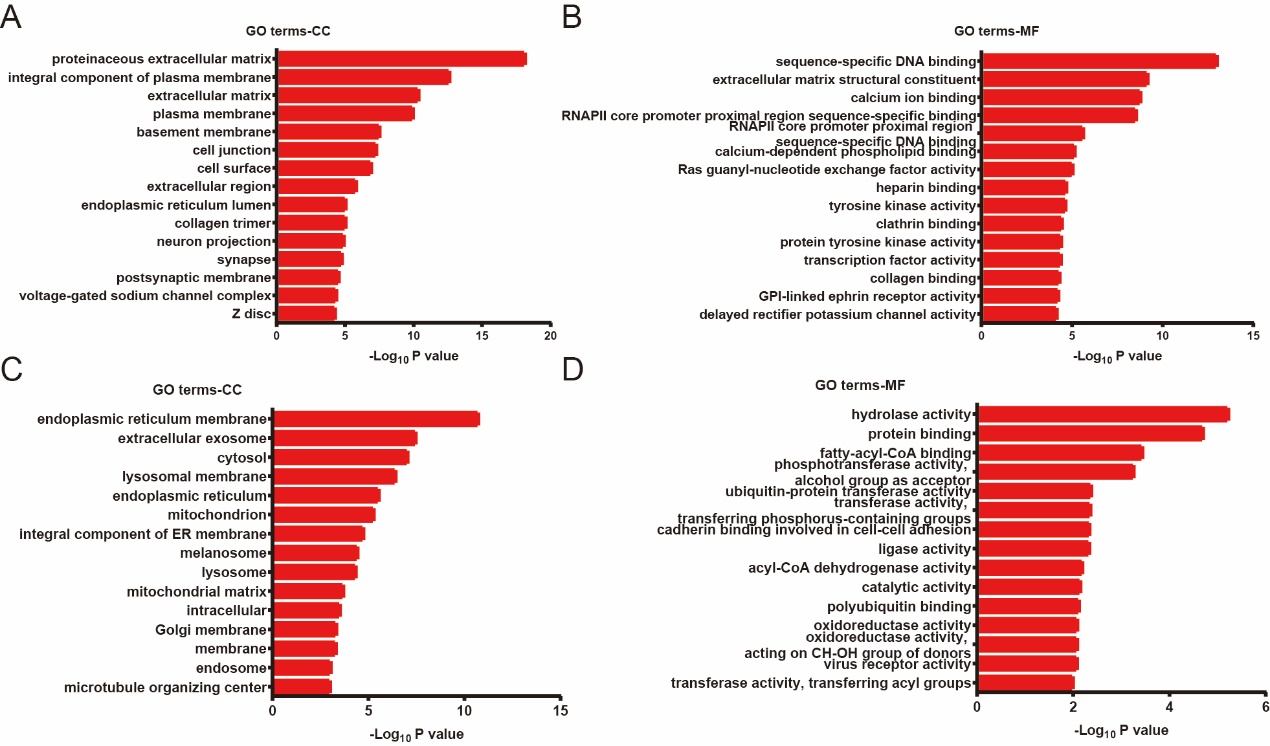


Supplementary Figure 1 GO enrichment results of differentially expressed genes. For enrichment analysis, a P-value ＜0.05  is taken to indicate statistical significance.

A. The GO- CC (Cellular Component) enrichment terms of upregulated genes.

B. The GO- MF (Molecular Function) enrichment terms of upregulated genes.

C. The GO- CC (Cellular Component) enrichment terms of downregulated genes.

D.The GO- MF (Molecular Function) enrichment terms of upregulated genes.


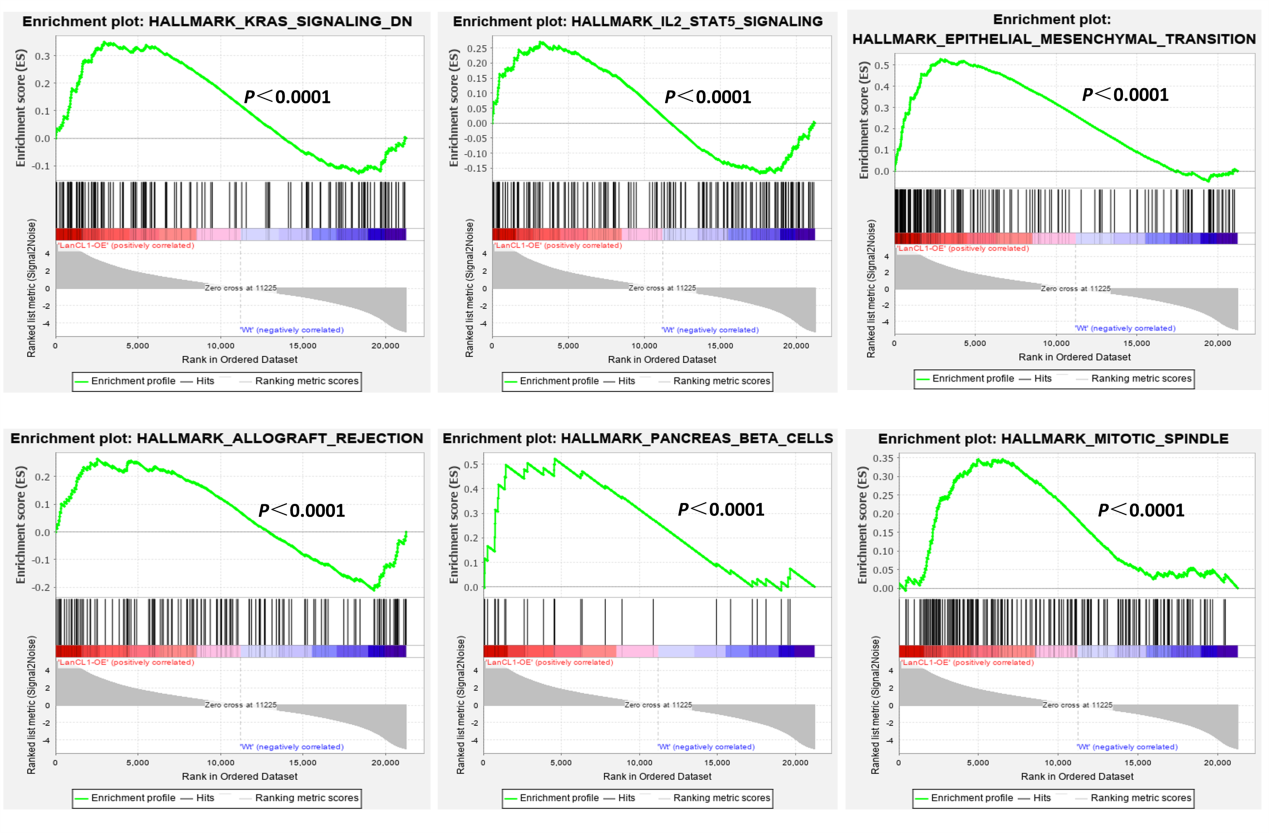


Supplementary Figure 2 Gene set enrichment analysis (GSEA) results of LanCL1 overexpression in prostate cancer cells (Top 10-15). In the analysis, we used the following values as cut-off values: the P-value cut-off value is 0.05 and the false discovery rate (FDR q-val) is <0.25.
